# Supplementary material
Source: HighWire-hosted journal article supplement (https://erj.ersjournals.com/content/61/1/2201390)

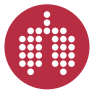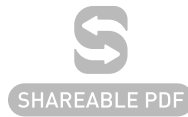

# Immunogenicity and safety of coadministration of COVID-19 and influenza vaccination

Isabell Wagenhäuser <sup>1,2</sup>, Julia Reusch <sup>1,2</sup>, Alexander Gabel <sup>1</sup>, Anna Höhn<sup>1</sup>, Thiên-Trí Lâm <sup>3</sup>, Giovanni Almanzar <sup>4</sup>, Martina Prelog <sup>4</sup>, Lukas B. Krone <sup>5,6</sup>, Anna Frey <sup>2</sup>, Alexandra Schubert-Unkmeir <sup>3</sup>, Lars Dölken <sup>7</sup>, Stefan Frantz <sup>2</sup>, Oliver Kurzai <sup>3,8</sup>, Ulrich Vogel <sup>1,3,†</sup>, Nils Petri <sup>2,9</sup> and Manuel Krone <sup>1,3,9</sup>

<sup>1</sup>Infection Control and Antimicrobial Stewardship Unit, University Hospital Wuerzburg, Wuerzburg, Germany. <sup>2</sup>Department of Internal Medicine I, University Hospital Wuerzburg, Wuerzburg, Germany. <sup>3</sup>Institute for Hygiene and Microbiology, University of Wuerzburg, Wuerzburg, Germany. <sup>4</sup>Paediatric Rheumatology/Special Immunology, Department of Paediatrics, University Hospital Wuerzburg, Wuerzburg, Germany. <sup>5</sup>Department of Physiology, Anatomy and Genetics, University of Oxford, Oxford, UK. <sup>6</sup>University Hospital of Psychiatry and Psychotherapy, University of Bern, Bern, Switzerland. <sup>7</sup>Institute for Virology and Immunobiology, University of Wuerzburg, Wuerzburg, Germany. <sup>8</sup>Leibniz Institute for Natural Product Research and Infection Biology – Hans-Knoell-Institute, Jena, Germany. <sup>9</sup>These authors contributed equally to this work.

Corresponding author: Manuel Krone ([krone\\_m@ukw.de](mailto:krone_m@ukw.de))

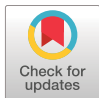

Shareable abstract (@ERSpublications)

**Coadministration of seasonal quadrivalent influenza and COVID-19 booster vaccination is safe and does not increase vaccine-related side-effects, but may limit anti-SARS-CoV-2 antibody formation**  
<https://bit.ly/3uKFUie>

**Cite this article as:** Wagenhäuser I, Reusch J, Gabel A, *et al.* Immunogenicity and safety of coadministration of COVID-19 and influenza vaccination. *Eur Respir J* 2023; 61: 2201390 [DOI: 10.1183/13993003.01390-2022].

This single-page version can be shared freely online.

Copyright ©The authors 2023.

This version is distributed under the terms of the Creative Commons Attribution Non-Commercial Licence 4.0. For commercial reproduction rights and permissions contact [permissions@ersnet.org](mailto:permissions@ersnet.org)

Received: 10 July 2022  
Accepted: 24 Nov 2022

*To the Editor:*

Seasonal influenza vaccination is established as important infection prevention measure, especially among highly exposed healthcare workers (HCWs) [1]. Coadministration with the third dose of COVID-19 vaccine could be an efficient strategy protecting HCWs from two major viral respiratory infections [2–4]. To date, the humoral immunogenicity and side-effects of a coadministered third COVID-19 and a seasonal quadrivalent influenza vaccine are still unclear, and the available data is limited in transferability to the general public [5–7]. This preference-based non-randomised controlled study examines the antibody-mediated immunogenicity and vaccine-related side-effects of mRNA-based COVID-19 and seasonal influenza vaccine coadministration in HCWs.

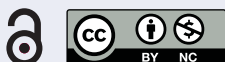

Supplement: inline-supplementary-material-1 [file inline-supplementary-material-1.pdf]
